# Supplementary material for: Biocompatible polymer brushes grown from model quartz fibres: synthesis, characterisation and in situ determination of frictional coefficient
Source: Royal Society of Chemistry journal article supplement (doi:10.1039/b921218c), 2010-01-01
Supplement: b921218c.pdf [file b921218c.pdf]

## Supporting Information

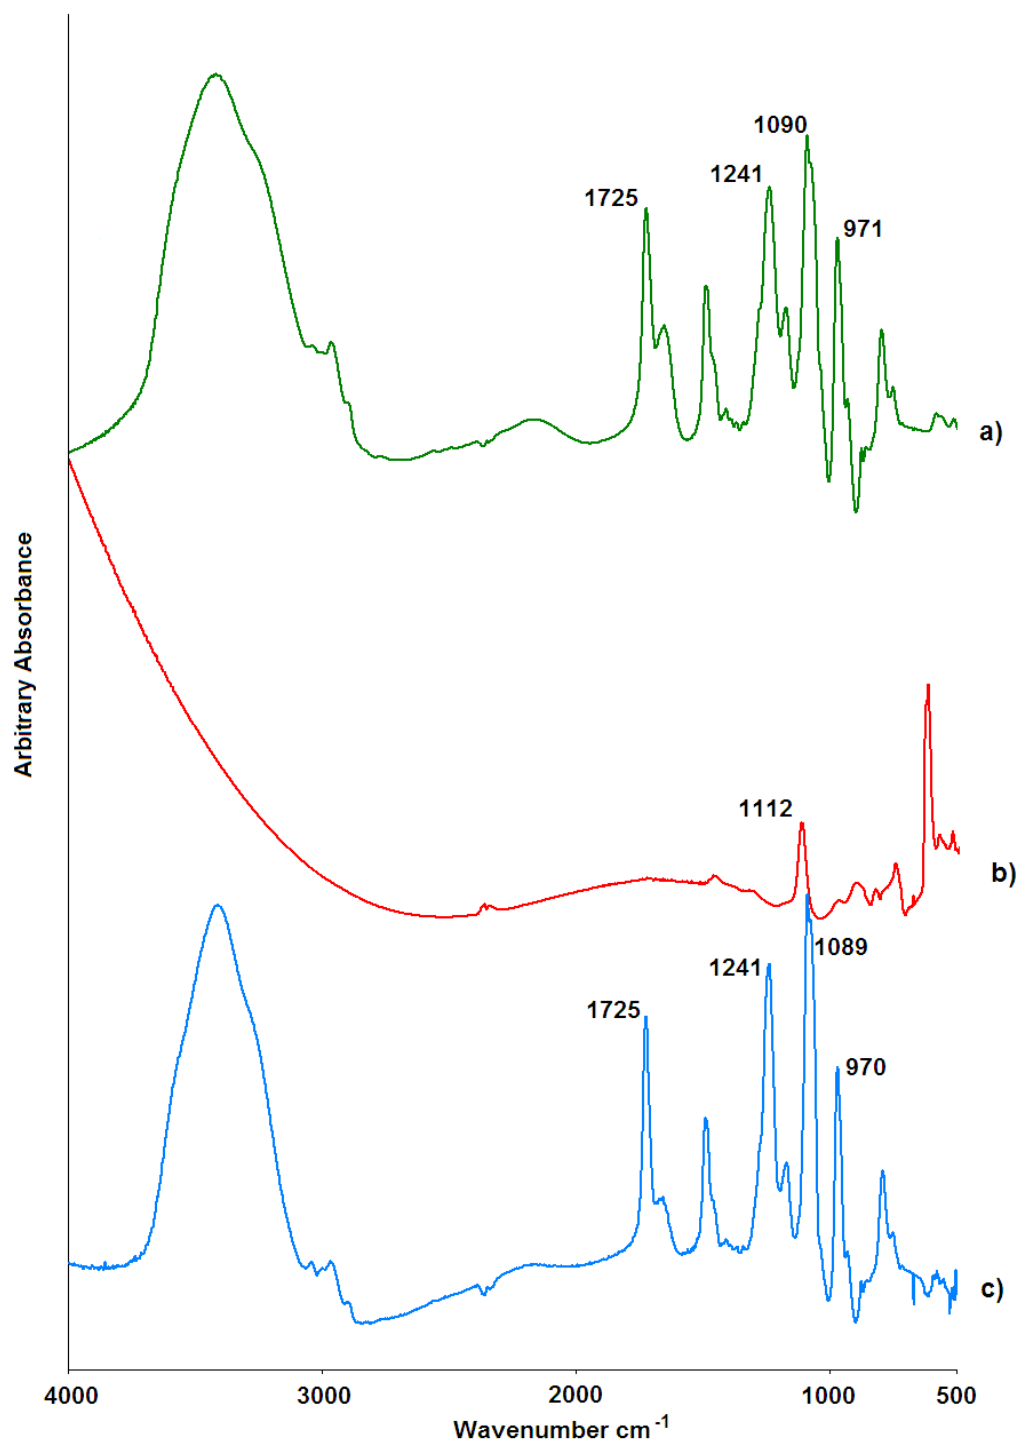

**Figure S1.** FT-IR spectra of: (a) PMPC homopolymer (KBr disc); (b) bare planar silicon wafer; (c) PMPC-coated silicon wafer. All spectra were recorded in transmission mode. Spectra have been vertically offset for clarity.
